# Supplementary material
Source: Springer Nature journal article supplement (https://www.springermedizin.de/resource/supplementary/13058_2011_2921_MOESM5_ESM.pdf/9702836)

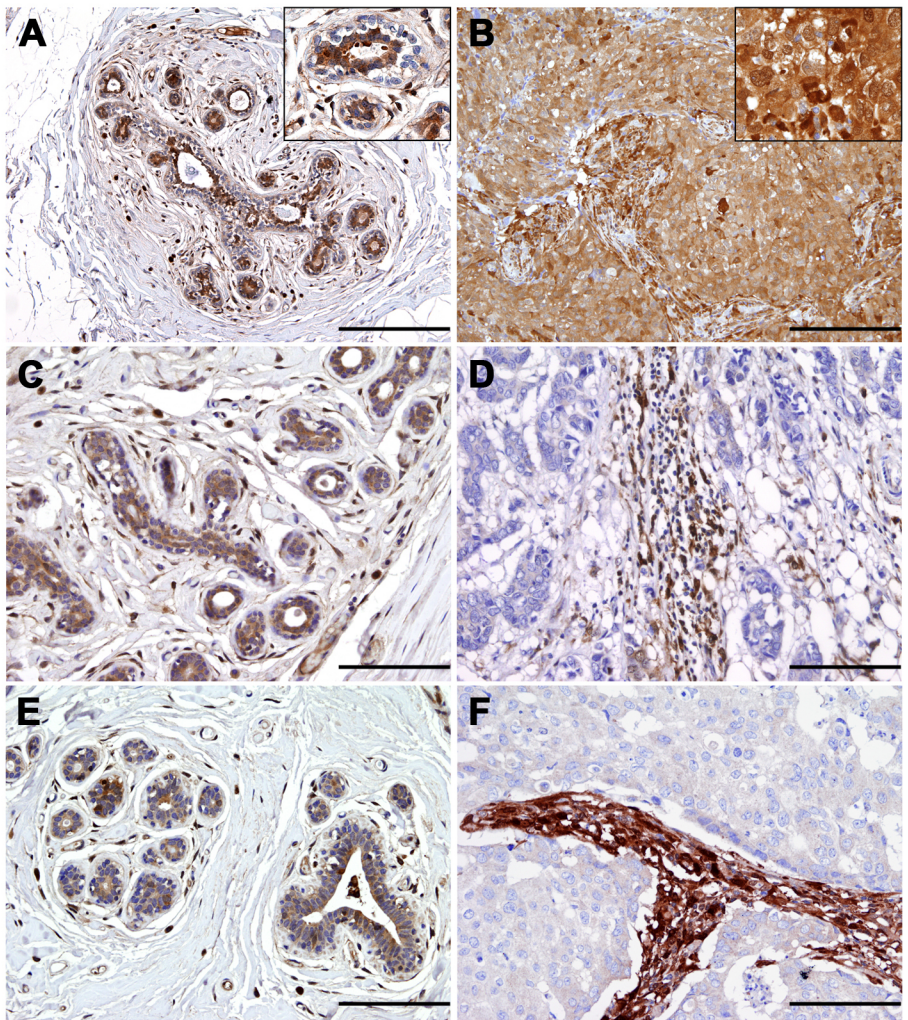

**G**

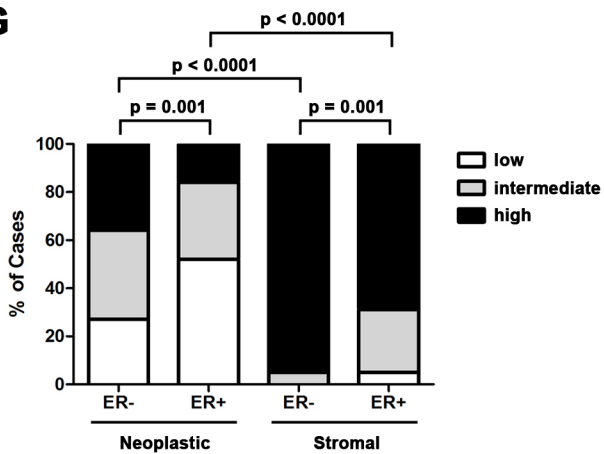

**H**

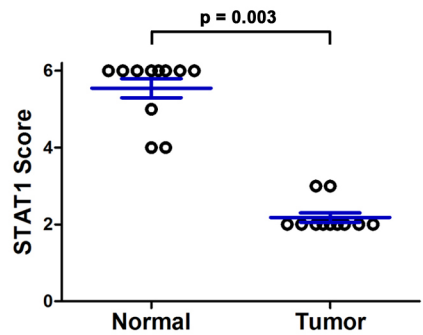

Supplement: MOESM5 [file 9702836]
